# Supplementary material for: Neighborhood Greenness Attenuates the Adverse Effect of PM2.5 on Cardiovascular Mortality in Neighborhoods of Lower Socioeconomic Status
Source: MDPI journal article supplement (doi:10.3390/ijerph16050814), 2019-03-06
Supplement: s1 [file s1]

# Supplemental Material: The Joint Modification of the PM<sub>2.5</sub> and Mortality Association by Neighborhood Land-Use and Sociodemographic Characteristics

**Table S1.** The joint modification of the PM<sub>2.5</sub> effect by NDVI, walkability and neighborhood sociodemographic characteristics.

| Sociodemographic Characteristics | <sup>1</sup> PM <sub>2.5</sub> :NDVI:SC<br>β (p value) | <sup>2</sup> PM <sub>2.5</sub> :walkability:SC<br>β (p value) |
|----------------------------------|--------------------------------------------------------|---------------------------------------------------------------|
| Population density               | -2.20 (0.001)                                          | 0.01 (0.838)                                                  |
| Percent 65 and older             | 0.03 (0.201)                                           | 0.01 (0.415)                                                  |
| Percent white                    | 0.03 (0.019)                                           | -0.01 (0.953)                                                 |
| Percent less than high school    | -0.06 (0.043)                                          | -0.01 (0.845)                                                 |
| Percent poverty                  | -0.11 (0.186)                                          | -0.02 (0.173)                                                 |
| Median household income          | 0.01 (0.106)                                           | -0.01 (0.857)                                                 |

<sup>1</sup> The interaction p value of the joint interaction between PM<sub>2.5</sub>, NDVI and each of the neighborhood sociodemographic characteristics (SC). <sup>2</sup> The interaction p value of the joint interaction between PM<sub>2.5</sub>, walkability and each of the neighborhood sociodemographic characteristics (SC).

**Table S2.** Percent increase in mortality for 10μg/m<sup>3</sup> of average PM<sub>2.5</sub> in the same and previous day: modification by NDVI within strata of low and high SES.

| SES strata                    | NDVI percentile  | Percent | Lower CI | Higher CI |
|-------------------------------|------------------|---------|----------|-----------|
| Low population density        | 25 <sup>th</sup> | 0.34%   | -1.84%   | 2.56%     |
|                               | 75 <sup>th</sup> | 3.58%   | 1.33%    | 5.88%     |
| High population density       | 25 <sup>th</sup> | 4.03%   | 2.00%    | 6.10%     |
|                               | 75 <sup>th</sup> | 1.46%   | -0.52%   | 3.47%     |
| Low % white                   | 25 <sup>th</sup> | 3.55%   | 1.49%    | 5.65%     |
|                               | 75 <sup>th</sup> | 2.47%   | 0.43%    | 4.56%     |
| High % white                  | 25 <sup>th</sup> | 1.14%   | -1.00%   | 3.33%     |
|                               | 75 <sup>th</sup> | 2.80%   | 0.62%    | 5.02%     |
| Low % no high school diploma  | 25 <sup>th</sup> | 1.42%   | -0.72%   | 3.62%     |
|                               | 75 <sup>th</sup> | 2.64%   | 0.46%    | 4.86%     |
| High % no high school diploma | 25 <sup>th</sup> | 3.31%   | 1.26%    | 5.41%     |
|                               | 75 <sup>th</sup> | 2.64%   | 0.60%    | 4.72%     |

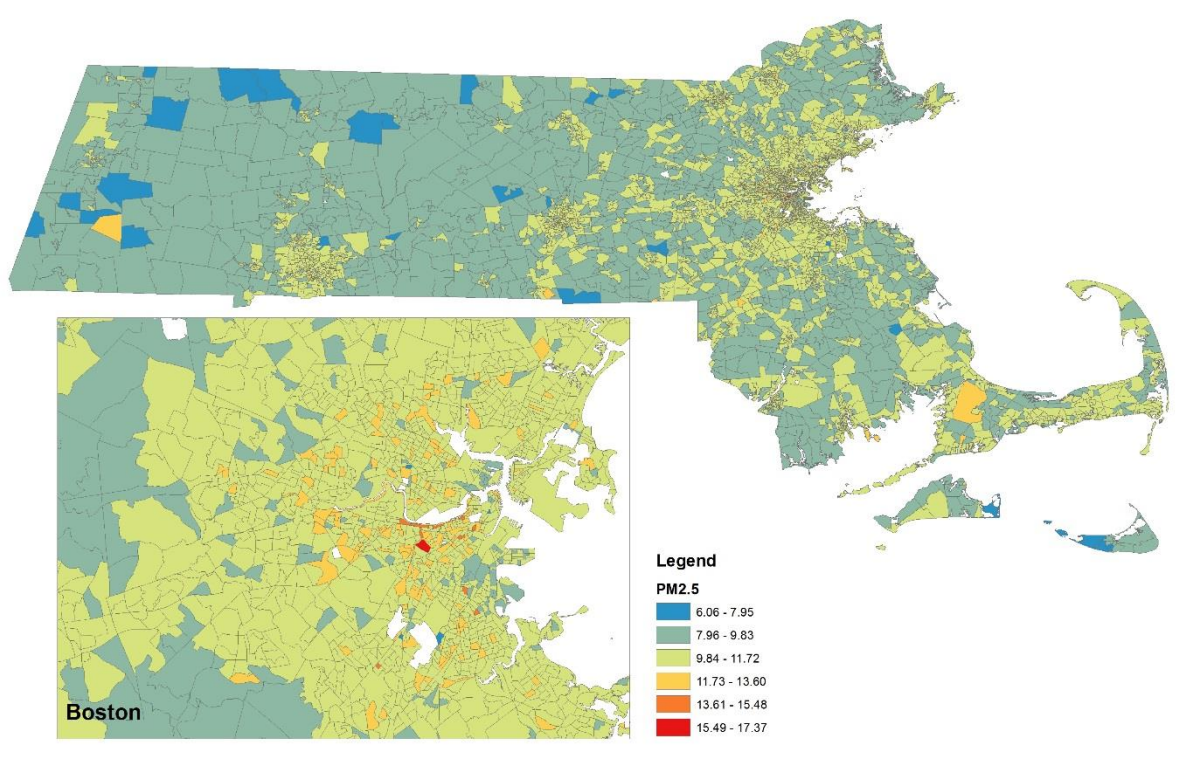

**Figure S1.** Block group average concentrations of PM<sub>2.5</sub> in the study area across Massachusetts (2001-2011).

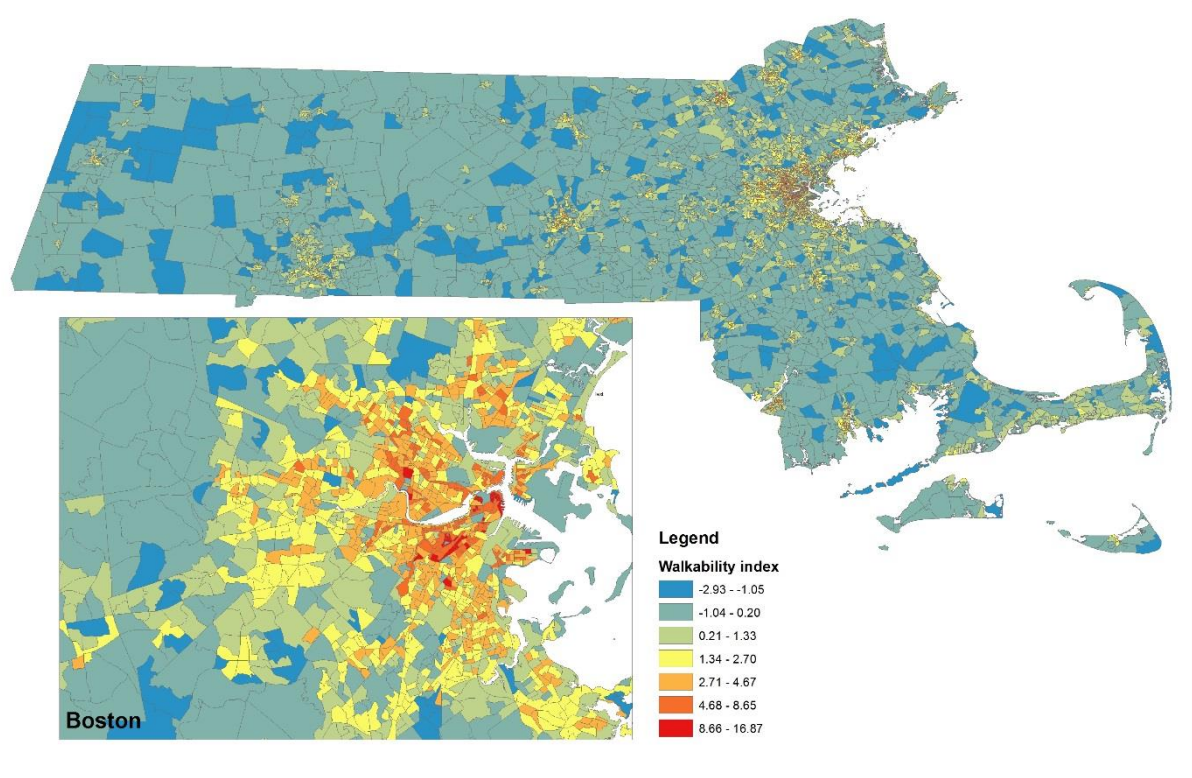

**Figure S2.** Block group average walkability index in the study area across Massachusetts (2001-2011).

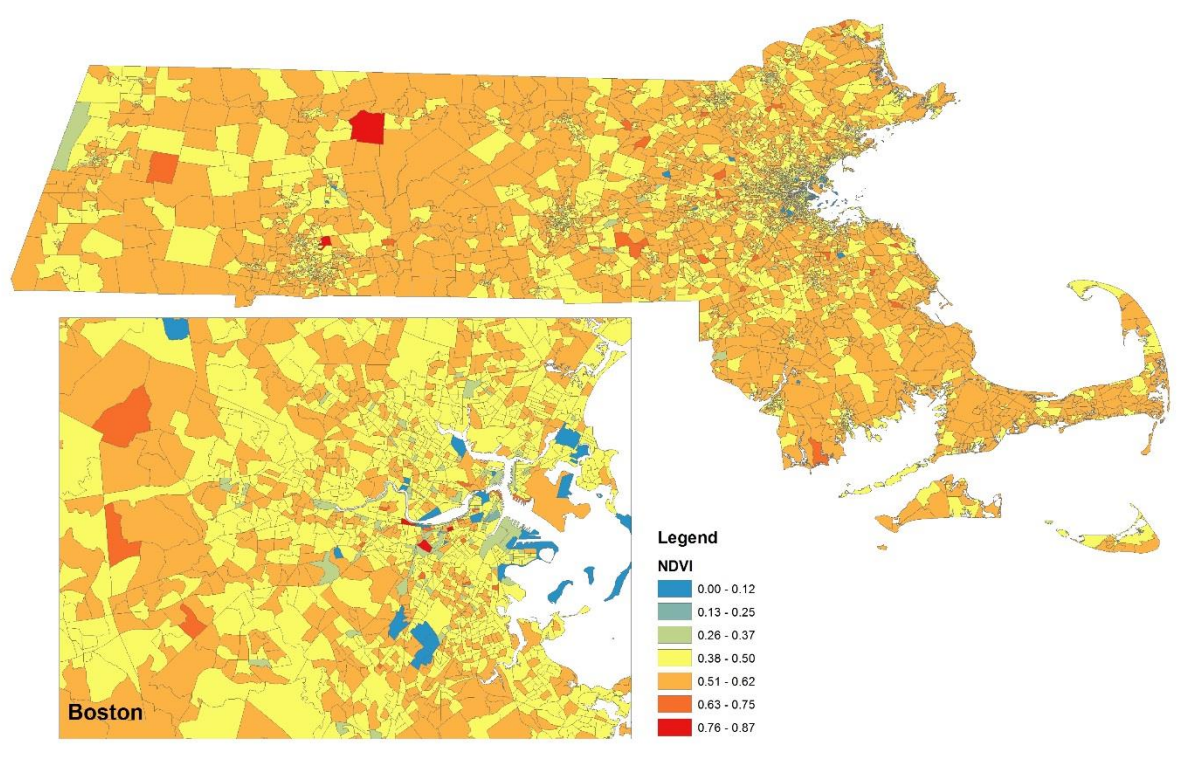

**Figure S3.** Block group average NDVI in the study area across Massachusetts (2001-2011).

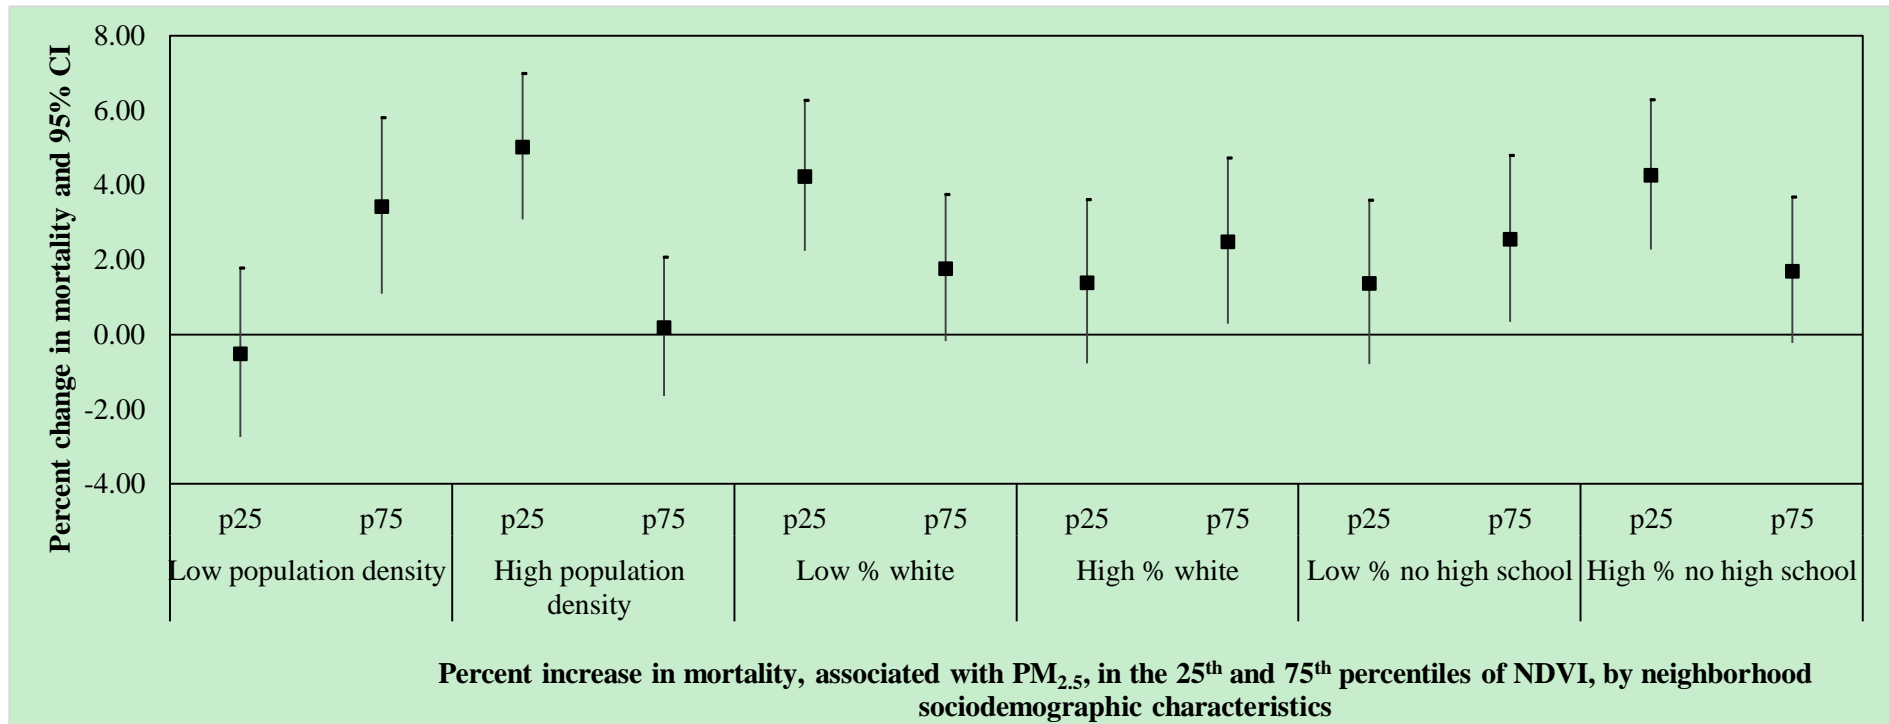

**Figure S4.** The Percent increase and 95% confidence intervals in cardiovascular mortality, associated with PM<sub>2.5</sub>, in the 25<sup>th</sup> and 75<sup>th</sup> percentiles of NDVI, by neighborhood sociodemographic characteristics. P25 and p75 refer to percentiles of annual NDVI.
